# Supplementary material
Source: PubMed Central journal article supplement (PMC3590100)
Supplement: supp_2012.069310_2012.069310.MASTRODEMOU_SUPPL.pdf [file supp_2012.069310_2012.069310.MASTRODEMOU_SUPPL.pdf]

**Clonal patterns of X-chromosome inactivation in peripheral blood cells of female patients with chronic idiopathic neutropenia**

Semeli Mastrodemou,<sup>1</sup> Vasilios Vazgiourakis,<sup>2</sup> Maria Velegraki,<sup>1</sup> Konstantia Pavlaki,<sup>1</sup> George N. Goulielmos,<sup>2</sup> and Helen A. Papadaki<sup>1</sup>

<sup>1</sup>Department of Hematology, University of Crete School of Medicine, Heraklion; and <sup>2</sup>Laboratory of Molecular Medicine and Human Genetics, University of Crete School of Medicine, Heraklion, Greece

Citation: Mastrodemou S, Vazgiourakis V, Velegraki M, Pavlaki K, Goulielmos GN, and Papadaki HA. Clonal patterns of X-chromosome inactivation in peripheral blood cells of female patients with chronic idiopathic neutropenia. *Haematologica* 2012;97(12):1931-1933. doi:10.3324/haematol.2012.069310

**Online Supplementary Table S1.** Laboratory data of CIN patients and X-chromosome inactivation patterns in PB cell subsets based on G6PD and IDS polymorphism expression.

| UPN | Age (years) | Duration (months) | Hb (g/dL) | WBC (x10 <sup>9</sup> /L) | Neutro (x10 <sup>9</sup> /L) | Lympho (x10 <sup>9</sup> /L) | Mono (x10 <sup>9</sup> /L) | Plts (x10 <sup>9</sup> /L) | G6PD |    | IDS |    |
|-----|-------------|-------------------|-----------|---------------------------|------------------------------|------------------------------|----------------------------|----------------------------|------|----|-----|----|
|     |             |                   |           |                           |                              |                              |                            |                            | G    | L  | G   | L  |
| 1   | 36          | 70                | 13.2      | 3.2                       | 1.2                          | 1.8                          | 0.2                        | 236                        |      |    | PC  | PC |
| 2   | 41          | 84                | 12.0      | 3.3                       | 1.4                          | 1.5                          | 0.4                        | 269                        |      |    | PC  | PC |
| 3   | 57          | 84                | 13.7      | 3.3                       | 0.9                          | 2.0                          | 0.4                        | 340                        |      |    | MC  | MC |
| 4   | 51          | 168               | 13.3      | 3.4                       | 1.6                          | 1.4                          | 0.3                        | 163                        | MC   | MC |     |    |
| 5   | 31          | 72                | 11.4      | 2.5                       | 0.5                          | 1.2                          | 0.8                        | 276                        | MC   | MC |     |    |
| 6   | 71          | 77                | 12.7      | 3.0                       | 0.9                          | 1.8                          | 0.3                        | 170                        | MC   | MC |     |    |
| 7   | 65          | 70                | 12.7      | 3.0                       | 0.9                          | 1.8                          | 0.3                        | 200                        | PC   | PC |     |    |
| 8   | 53          | 69                | 13.8      | 3.2                       | 1.7                          | 1.2                          | 0.3                        | 164                        | PC   | PC |     |    |
| 9   | 25          | 20                | 13.0      | 3.6                       | 1.4                          | 2.0                          | 0.2                        | 236                        |      |    | MC  | MC |
| 10  | 55          | 48                | 12.8      | 2.5                       | 1.2                          | 1.0                          | 0.3                        | 280                        | MC   | MC | MC  | MC |
| 11  | 51          | 144               | 12.8      | 3.3                       | 1.5                          | 1.4                          | 0.4                        | 218                        | PC   | PC |     |    |
| 12  | 60          | 96                | 13.5      | 2.9                       | 0.9                          | 1.7                          | 0.3                        | 248                        | MC   | MC |     |    |
| 13  | 45          | 60                | 13.3      | 3.0                       | 1.1                          | 1.7                          | 0.2                        | 171                        |      |    | MC  | MC |
| 14  | 50          | 168               | 11.6      | 3.2                       | 1.1                          | 1.8                          | 0.3                        | 316                        |      |    | MC  | MC |
| 15  | 77          | 216               | 13.2      | 3.4                       | 1.1                          | 1.5                          | 0.27                       | 204                        | PC   | PC | PC  | PC |
| 16  | 65          | 192               | 12.6      | 3.4                       | 1.7                          | 1.2                          | 0.4                        | 202                        |      |    | PC  | PC |
| 17  | 49          | 190               | 13.3      | 2.9                       | 1.0                          | 1.5                          | 0.4                        | 278                        |      |    | PC  | PC |
| 18  | 64          | 216               | 12.8      | 2.8                       | 1.2                          | 1.3                          | 0.3                        | 200                        |      |    | PC  | PC |
| 19  | 74          | 120               | 13.2      | 3.6                       | 0.9                          | 2.4                          | 0.3                        | 230                        | PC   | PC | PC  | PC |
| 20  | 54          | 30                | 13.0      | 3.3                       | 1.2                          | 1.9                          | 0.2                        | 180                        | PC   | PC | PC  | PC |
| 21  | 78          | 24                | 12.5      | 2.7                       | 1.1                          | 1.4                          | 0.2                        | 219                        | PC   | PC | PC  | PC |
| 22  | 61          | 252               | 11.9      | 3.5                       | 1.3                          | 1.7                          | 0.3                        | 320                        | PC   | PC | PC  | PC |
| 23  | 48          | 156               | 14.3      | 3.5                       | 1.7                          | 1.5                          | 0.2                        | 243                        | MC   | MC |     |    |
| 24  | 57          | 288               | 14.1      | 3.0                       | 1.3                          | 1.3                          | 0.4                        | 161                        |      |    | MC  | MC |
| 25  | 67          | 108               | 12.6      | 3.1                       | 1.1                          | 1.7                          | 0.3                        | 216                        | MC   | MC |     |    |
| 26  | 68          | 192               | 12.9      | 3.5                       | 1.4                          | 1.8                          | 0.3                        | 259                        |      |    | PC  | PC |
| 27  | 79          | 108               | 10.4      | 2.6                       | 1.4                          | 1.0                          | 0.2                        | 196                        |      |    | MC  | MC |
| 28  | 68          | 120               | 13.4      | 3.7                       | 1.6                          | 1.7                          | 0.4                        | 216                        | PC   | PC |     |    |
| 29  | 46          | 192               | 10.6      | 3.6                       | 1.6                          | 1.8                          | 0.2                        | 204                        | PC   | PC | PC  | PC |
| 30  | 40          | 36                | 13.0      | 3.0                       | 1.7                          | 1.2                          | 0.1                        | 139                        | PC   | PC |     |    |
| 31  | 61          | 84                | 13.0      | 2.8                       | 1.0                          | 1.5                          | 0.3                        | 221                        |      |    | MC  | MC |
| 32  | 66          | 72                | 12.9      | 3.9                       | 1.7                          | 1.7                          | 0.5                        | 142                        |      |    | PC  | PC |
| 33  | 46          | 60                | 13.0      | 3.9                       | 1.6                          | 2.0                          | 0.3                        | 280                        | MC   | MC |     |    |
| 34  | 73          | 168               | 13.8      | 2.4                       | 0.5                          | 1.6                          | 0.3                        | 164                        | MC   | MC |     |    |
| 35  | 87          | 120               | 12.9      | 2.4                       | 0.8                          | 1.2                          | 0.4                        | 190                        | PC   | PC |     |    |
| 36  | 69          | 144               | 12.9      | 2.8                       | 1.1                          | 1.4                          | 0.3                        | 220                        | PC   | PC |     |    |
| 37  | 58          | 20                | 13.8      | 2.9                       | 1.4                          | 1.2                          | 0.3                        | 164                        |      |    | PC  | PC |
| 38  | 46          | 96                | 14.4      | 3.4                       | 1.7                          | 1.4                          | 0.3                        | 175                        |      |    | MC  | MC |
| 39  | 50          | 60                | 12.6      | 2.5                       | 1.0                          | 1.2                          | 0.3                        | 200                        | PC   | PC | PC  | PC |
| 40  | 59          | 31                | 12.8      | 3.5                       | 1.4                          | 1.8                          | 0.3                        | 259                        |      |    | PC  | PC |
| 41  | 68          | 108               | 13.0      | 3.5                       | 1.4                          | 1.8                          | 0.3                        | 203                        | PC   | PC |     |    |

continued on the next page

continued from the previous page

|    |    |     |      |     |     |     |     |     |    |    |    |    |
|----|----|-----|------|-----|-----|-----|-----|-----|----|----|----|----|
| 42 | 58 | 240 | 12.4 | 2.6 | 1.0 | 1.4 | 0.2 | 263 |    |    | PC | PC |
| 43 | 38 | 180 | 12.2 | 2.4 | 1.0 | 1.2 | 0.2 | 187 | MC | PC |    |    |
| 44 | 59 | 168 | 12.9 | 2.4 | 1.1 | 1.0 | 0.3 | 250 |    |    | PC | PC |
| 45 | 62 | 156 | 11.6 | 3.2 | 1.1 | 1.8 | 0.3 | 316 | MC | MC | MC | MC |
| 46 | 73 | 108 | 13.6 | 3.9 | 1.6 | 1.8 | 0.5 | 195 |    |    | MC | MC |
| 47 | 50 | 14  | 13.0 | 3.7 | 1.5 | 2.0 | 0.2 | 236 |    |    | PC | PC |
| 48 | 61 | 144 | 11.3 | 2.5 | 1.2 | 1.0 | 0.3 | 294 |    |    | MC | MC |
| 49 | 55 | 96  | 13.5 | 2.9 | 0.9 | 1.7 | 0.3 | 200 |    |    | MC | MC |
| 50 | 52 | 48  | 12.8 | 3.3 | 0.8 | 2.0 | 0.4 | 190 | MC | MC | MC | MC |
| 51 | 66 | 96  | 12.4 | 2.1 | 0.5 | 1.1 | 0.6 | 250 | MC | MC |    |    |
| 52 | 54 | 72  | 12.4 | 2.9 | 1.5 | 1.1 | 0.3 | 182 |    |    | MC | MC |
| 53 | 39 | 108 | 12.8 | 2.5 | 1.2 | 1.0 | 0.3 | 280 | PC | PC | PC | PC |
| 54 | 50 | 204 | 12.1 | 2.9 | 1.4 | 1.4 | 0.1 | 281 |    |    | MC | MC |
| 55 | 22 | 144 | 13.2 | 3.6 | 0.7 | 2.2 | 0.7 | 323 | MC | MC |    |    |
| 56 | 24 | 276 | 11.8 | 3.3 | 0.8 | 2.0 | 0.4 | 240 |    |    | PC | PC |
| 57 | 57 | 48  | 13.2 | 3.6 | 1.1 | 1.8 | 0.7 | 278 | PC | PC | PC | PC |
| 58 | 55 | 72  | 13.5 | 3.6 | 1.4 | 1.9 | 0.3 | 352 | MC | MC |    |    |
| 59 | 59 | 60  | 11.6 | 2.8 | 1.1 | 1.5 | 0.2 | 263 | PC | PC |    |    |
| 60 | 67 | 72  | 13.0 | 3.7 | 1.5 | 2.0 | 0.2 | 236 |    |    | MC | MC |
| 61 | 35 | 84  | 13.6 | 3.5 | 1.5 | 1.6 | 0.3 | 334 | PC | PC |    |    |
| 62 | 57 | 60  | 13.9 | 2.9 | 1.2 | 1.4 | 0.3 | 155 | MC | MC | MC | MC |
| 63 | 47 | 108 | 12.6 | 3.7 | 1.4 | 2.1 | 0.2 | 248 |    |    | MC | MC |
| 64 | 63 | 156 | 13.4 | 3.5 | 1.4 | 1.7 | 0.4 | 216 |    |    | PC | PC |
| 65 | 45 | 120 | 12.0 | 2.7 | 1.3 | 1.1 | 0.3 | 164 | PC | PC |    |    |
| 66 | 59 | 192 | 13.6 | 2.7 | 1.0 | 1.5 | 0.2 | 223 | MC | MC |    |    |
| 67 | 61 | 48  | 12.7 | 3.8 | 1.4 | 2.0 | 0.4 | 200 |    |    | PC | PC |
| 68 | 49 | 84  | 13.2 | 3.0 | 0.7 | 2.1 | 0.2 | 323 |    |    | MC | PC |
| 69 | 69 | 72  | 13.6 | 3.3 | 1.2 | 1.9 | 0.2 | 190 | MC | PC | MC | PC |
| 70 | 57 | 108 | 13.3 | 3.0 | 1.4 | 1.4 | 0.2 | 291 | MC | PC | MC | PC |
| 71 | 69 | 120 | 13.3 | 2.9 | 1.0 | 1.5 | 0.4 | 278 |    |    | PC | PC |
| 72 | 77 | 48  | 12.8 | 3.3 | 1.5 | 1.6 | 0.2 | 171 |    |    | PC | PC |
| 73 | 71 | 120 | 13.5 | 4.0 | 1.3 | 2.5 | 0.2 | 239 |    |    | MC | MC |
| 74 | 50 | 108 | 12.9 | 3.6 | 1.6 | 1.7 | 0.3 | 234 | PC | PC |    |    |
| 75 | 46 | 120 | 11.5 | 3.3 | 1.7 | 1.3 | 0.2 | 172 |    |    | PC | PC |
| 76 | 54 | 84  | 12.1 | 3.1 | 1.3 | 1.3 | 0.4 | 269 | MC | PC |    |    |

CIN: chronic idiopathic neutropenia; UPN: unique patient number; Hb: hemoglobin; WBC: white blood cells; Neutro: neutrophils; Lympho: lymphocytes; Mono: monocytes; Plts: platelets; G6PD: glucose-6-phosphate dehydrogenase; IDS: iduronate-2-sulfatase; G: granulocytes; L: lymphocytes; MC: monoclonal; PC: polyclonal.
