# Supplementary material
Source: PubMed Central journal article supplement (PMC3590100)
Supplement: supp_2012.069310_2012_069310-Contributions.pdf [file supp_2012.069310_2012_069310-Contributions.pdf]

**Manuscript no. HAEMATOL/2012/069310 entitled “Clonal patterns of X-chromosome inactivation in peripheral blood cells of female patients with Chronic Idiopathic Neutropenia“**

**Authors: Semeli Mastrodemou, Vasilios Vazgiourakis, Maria Velegraki, Konstantia Pavlaki, George N. Goulielmos, Helen A. Papadaki**

**Information about the contributions of each person named as having participated in the study**

**1) Guarantor(s)**, i.e., person(s) who is (are) responsible for the integrity of the work as a whole:  
• Helen A.Papadaki, MD PhD Professor of Hematology, epapadak@med.uoc.gr

According to the International Committee of Medical Journal Editors (ICMJE) ([http://www.icmje.org/ethical\\_1author.html](http://www.icmje.org/ethical_1author.html)): “*Authorship credit should be based on: 1) substantial contributions to conception and design, acquisition of data, or analysis and interpretation of data; 2) drafting the article or revising it critically for important intellectual content; and 3) final approval of the version to be published. Authors should meet conditions 1, 2, and 3 ..... Acquisition of funding, collection of data, or general supervision of the research group alone does not constitute authorship*”.

The guarantors of this manuscript confirm that all persons designated as authors qualify for authorship, and that each author has participated sufficiently in the work to take public responsibility for appropriate portions of the content.

2) Authors who participated in the **conception of the study**: Helen A. Papadaki

3) **Design & Methods**. The following authors were responsible for specific investigations (please detail):

- Helen A. Papadaki and George N. Goulielmos were responsible for supervising the experiments.
- Helen A. Papadaki, Maria Velegraki and Konstantia Pavlaki were responsible providing patient samples.
- Semeli Mastrodemou, Maria Velegraki and Konstantia Pavlaki were responsible for cell separation and DNA and RNA extraction.
- Semeli Mastrodemou and Vasilios Vazgiourakis were responsible for performing PCR for G6PD and IDS genes genotyping for C/T silent polymorphism at nt.1311 and nt. 438 respectively and clonality analysis.
- Helen A. Papadaki was responsible for statistical analysis.

4) **Results**. The following authors were responsible for specific portions of the results, including figures and tables (please indicate the person responsible for each figure and each table):

- Helen A. Papadaki, Semeli Mastrodemou, Vasilios Vazgiourakis, George N. Goulielmos were responsible for analyzing and interpreting the data
- Helen A. Papadaki was responsible for table 1.
- Semeli Mastrodemou was responsible for figure 1.

5) **Writing the manuscript**. The following authors were responsible for writing the manuscript:

- Helen A. Papadaki was responsible for writing the manuscript.
- George N. Goulielmos was responsible for thoroughly reading the manuscript.

6) **Contributors Listed in Acknowledgments**:

The authors declare no competing financial interests. This work was partially supported by a grant from the Hellenic Hematology Association to Semeli Mastrodemou and the grant 09SYN-13-880 of the Greek Ministry of National Education and Religious Affairs to Helen A. Papadaki. (Examples of those who might be acknowledged include a person who provided purely technical help, writing assistance, or a department chair who provided only general support.

Corresponding authors must declare whether they had assistance with the study design, data collection, data analysis, or manuscript preparation. If such assistance was available, the authors must disclose the identity of the individuals who provided this assistance and the entity that supported it. Financial and material support should also be acknowledged.)
